# Supplementary material for: Extreme heat and mortality in the State of Rio de Janeiro in the 2023/24 season: attribution to climate change and ENSO
Source: Copernicus journal article supplement (doi:10.5194/egusphere-2025-792), 2025-02-26
Supplement: Supplementary file [file egusphere-2025-792-RC1-supplement.pdf]

Why did authors use the 15% threshold for showing missing data points "less than 15% of missing data in the period 1971-2024 are identified with a black dot and the name?" The second warmest day in 83738 Resende appear to be around 1976 (Figure 2) however it does not match with Table 1 with its reporting in 2023. Similarly, peaks in temperature appears much before as shown in Figure 2 than its reporting in Table 1 (83718 Cordeiro). The ENSO is itself impacted by climate change, then how do authors decouple the separate impact of climate change and ENSO. In addition, without a scientific evidence it is vague to say or quantify how they both impact extreme heat. Mortality is heavily driven by extreme heat in combination with higher humidity which is not at all explored. The figure qualities are also inadequate and not suitable for scientific standard publications.
